# Supplementary material for: Homologative Alkene Difunctionalization
Source: Research Square preprint supplement (doi:10.21203/rs.3.rs-6070447/v1), 2025-06-06
Supplement: Supplementary file 1 [file bbeea7269f5a2266ad7878dc.docx]

**Homologative Alkene Difunctionalization**

**SI Guide**

This file includes followings: I. General Information; II. Procedures for the Preparation of Starting Materials; III. Optimization of Reaction Conditions; IV. Synthetic Examples; V. Mechanistic Investigations; VI. Crystallographic Data; VII. Computational Studies; VIII. References; IX. NMR Spectral Copies.

Fig. S1-S30, Table S1-S12, and supplementary text contain experimental details.
